# Supplementary material for: Size dependence of optical and mechanical properties of Si3N4nanobelts controlled by flow rates
Source: Royal Society of Chemistry journal article supplement (doi:10.1039/c6tc03802f), 2016-01-01
Supplement: c6tc03802f1.pdf [file c6tc03802f1.pdf]

## Electronic Supplementary Information

### Size-dependence of optical and mechanical properties of Si<sub>3</sub>N<sub>4</sub> nanobelts controlled by flow rate

**Shun Dong, Ping Hu\*, Xinghong Zhang\*, Yuan Cheng, Dongyang Zhang,  
Liwen Yan, Guiqing Chen**

Science and Technology on Advanced Composites in Special Environment Laboratory, Harbin  
Institute of Technology, Harbin 150001, PR China

*\*Corresponding author: Tel/fax: +86 451 86403016.*

**E-mail address: Hupinghit88@163.com (P. Hu); zhangxh@hit.edu.cn (X.H. Zhang)**

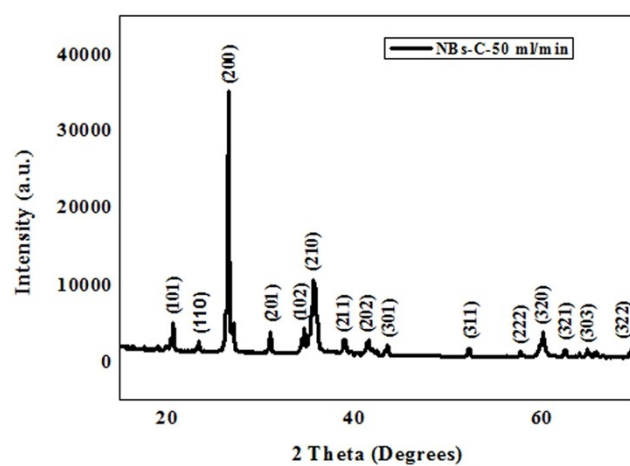

**Fig. S1** A XRD pattern of the products synthesized with 50ml/min of N<sub>2</sub> at 1450°C.

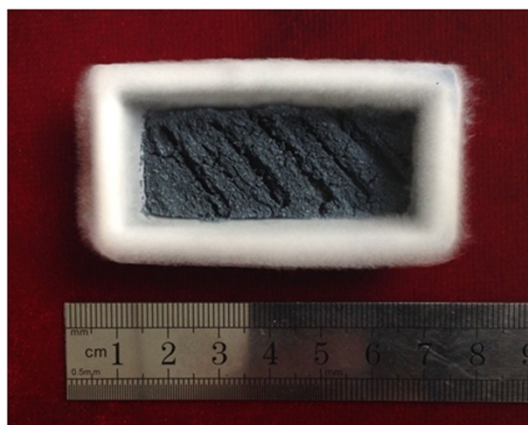

**Fig. S2** The macroscopic morphology of the achieved products synthesized with 50ml/min of N<sub>2</sub>.

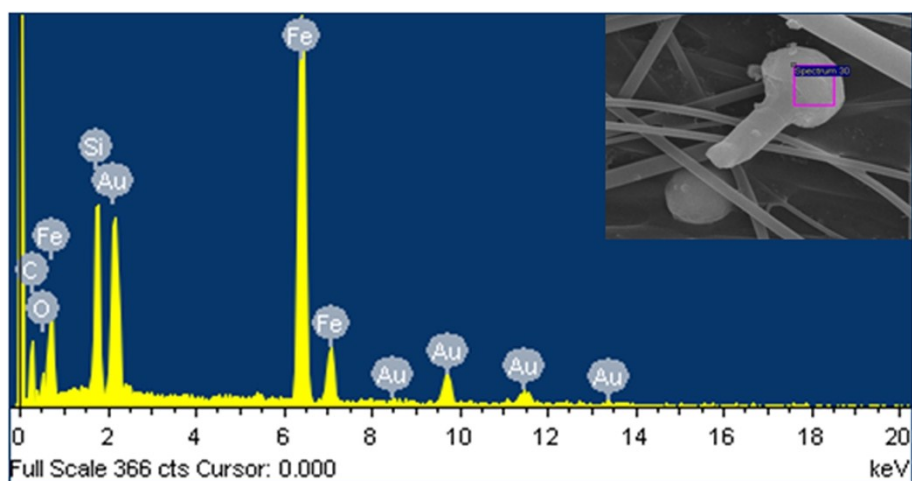

**Fig. S3** A typical EDX spectrum of the tip of  $\text{Si}_3\text{N}_4$  NB.

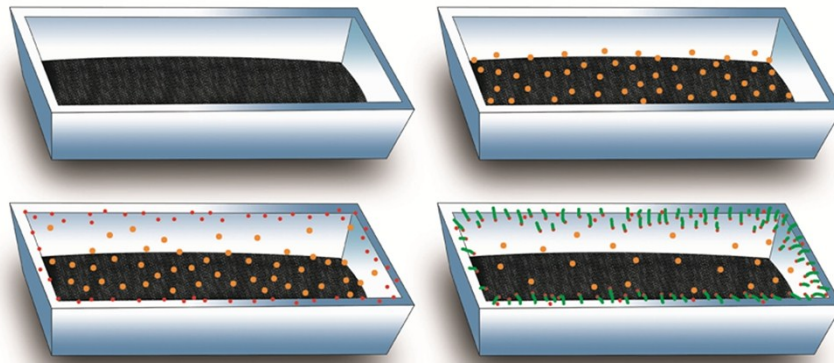

**Fig. S4** A schematic illustration for the growth process of Si<sub>3</sub>N<sub>4</sub> NBs with three stages.

**Table S1** The thermodynamics data of the related compounds<sup>1</sup>

|                                           | SiO <sub>2</sub> | SiO      | CO       | C       | CO <sub>2</sub> | Si <sub>3</sub> N <sub>4</sub> | N <sub>2</sub> |
|-------------------------------------------|------------------|----------|----------|---------|-----------------|--------------------------------|----------------|
| G <sub>298</sub> (kJ mol <sup>-1</sup> )  | -923.219         | -163.495 | -169.474 | -1.712  | -457.240        | -778.433                       | -57.128        |
| G <sub>1800</sub> (kJ mol <sup>-1</sup> ) | -1094.073        | -538.622 | -519.873 | -38.183 | -859.379        | -1173.986                      | -397.969       |

**Details of the thermodynamic calculations:**

The change in Gibbs free energy is the difference of Gibbs free energy between the reaction products and the reactants.<sup>2</sup>

$$\Delta G = \sum(n_i G)_{\text{product}} - \sum(m_i G)_{\text{reactant}}$$

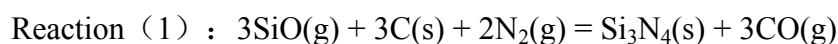

$$\Delta G_{298} = \Delta G_{\text{Si}_3\text{N}_4} + 3\Delta G_{\text{CO}} - 3\Delta G_{\text{SiO}} - 3\Delta G_{\text{C}} - 2\Delta G_{\text{N}_2} = -778.433 + (-169.474 \times 3) - (-163.495 \times 3) - (-1.712 \times 3) - (-57.128 \times 2) = -1286.855 + 609.877 = -676.978 \text{ kJ mol}^{-1}$$

$$\Delta G_{1800} = \Delta G_{\text{Si}_3\text{N}_4} + 3\Delta G_{\text{CO}} - 3\Delta G_{\text{SiO}} - 3\Delta G_{\text{C}} - 2\Delta G_{\text{N}_2} = -1173.986 + (-519.873 \times 3) - (-538.622 \times 3) - (-38.183 \times 3) - (-397.969 \times 2) = -2733.605 + 2526.353 = -207.252 \text{ kJ mol}^{-1}$$

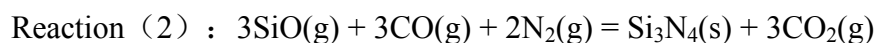

$$\Delta G_{298} = \Delta G_{\text{Si}_3\text{N}_4} + 3\Delta G_{\text{CO}_2} - 3\Delta G_{\text{SiO}} - 3\Delta G_{\text{CO}} - 2\Delta G_{\text{N}_2} = -778.433 + (-457.240 \times 3) - (-163.495 \times 3) - (-169.474 \times 3) - (-57.128 \times 2) = -2150.153 + 1113.163 = -1036.99 \text{ kJ mol}^{-1}$$

$$\Delta G_{1800} = \Delta G_{\text{Si}_3\text{N}_4} + 3\Delta G_{\text{CO}_2} - 3\Delta G_{\text{SiO}} - 3\Delta G_{\text{CO}} - 2\Delta G_{\text{N}_2} = -1173.986 + (-859.379 \times 3) - (-538.622 \times 3) - (-519.873 \times 3) - (-397.969 \times 2) = -3752.123 + 3971.423 = 219.3 \text{ kJ mol}^{-1}$$

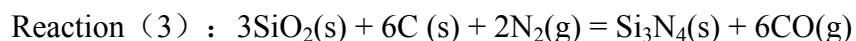

$$\Delta G_{298} = \Delta G_{\text{Si}_3\text{N}_4} + 6\Delta G_{\text{CO}} - 3\Delta G_{\text{SiO}_2} - 6\Delta G_{\text{C}} - 2\Delta G_{\text{N}_2} = -778.433 + (-169.474 \times 6) - (-923.219 \times 3) - (-1.712 \times 6) - (-57.128 \times 2) = -1795.277 + 2794.185 = 998.908 \text{ kJ mol}^{-1}$$

$$\Delta G_{1800} = \Delta G_{\text{Si}_3\text{N}_4} + 6\Delta G_{\text{CO}} - 3\Delta G_{\text{SiO}_2} - 6\Delta G_{\text{C}} - 2\Delta G_{\text{N}_2} = -1173.986 + (-519.873 \times 6) - (-1094.073 \times 3) - (-38.183 \times 6) - (-397.969 \times 2) = -4293.224 + 4307.255 = 14.031 \text{ kJ mol}^{-1}$$

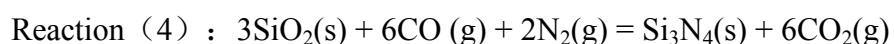

$$\Delta G_{298} = \Delta G_{\text{Si}_3\text{N}_4} + 6\Delta G_{\text{CO}_2} - 3\Delta G_{\text{SiO}_2} - 6\Delta G_{\text{CO}} - 2\Delta G_{\text{N}_2} = -778.433 + (-457.240 \times 6) - (-923.219 \times 3) - (-169.474 \times 6) - (-57.128 \times 2) = -3521.873 + 3900.757 = 378.884 \text{ kJ mol}^{-1}$$

$$\Delta G_{1800} = \Delta G_{\text{Si}_3\text{N}_4} + 6\Delta G_{\text{CO}_2} - 3\Delta G_{\text{SiO}_2} - 6\Delta G_{\text{CO}} - 2\Delta G_{\text{N}_2} = -1173.986 + (-859.379 \times 6) - (-1094.073 \times 3) - (-519.873 \times 6) - (-397.969 \times 2) = -6330.26 + 7197.395 = 867.135 \text{ kJ mol}^{-1}$$

The changes in Gibbs free energy as a function of temperatures for reactions (1)-(4) have been added to show the results of the thermodynamic calculations.

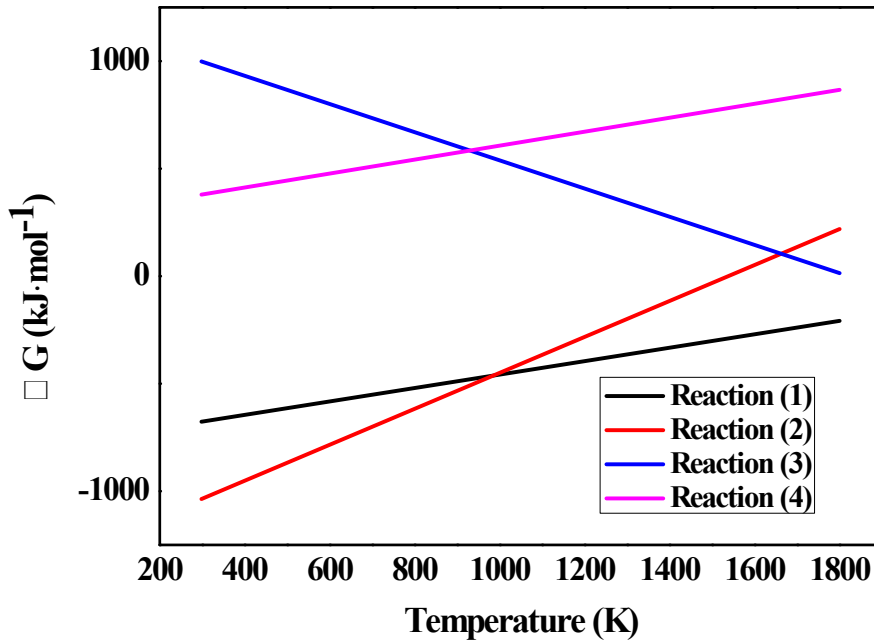

**Fig. S5** The changes in Gibbs free energy as a function of temperature for reactions (1)-(4).

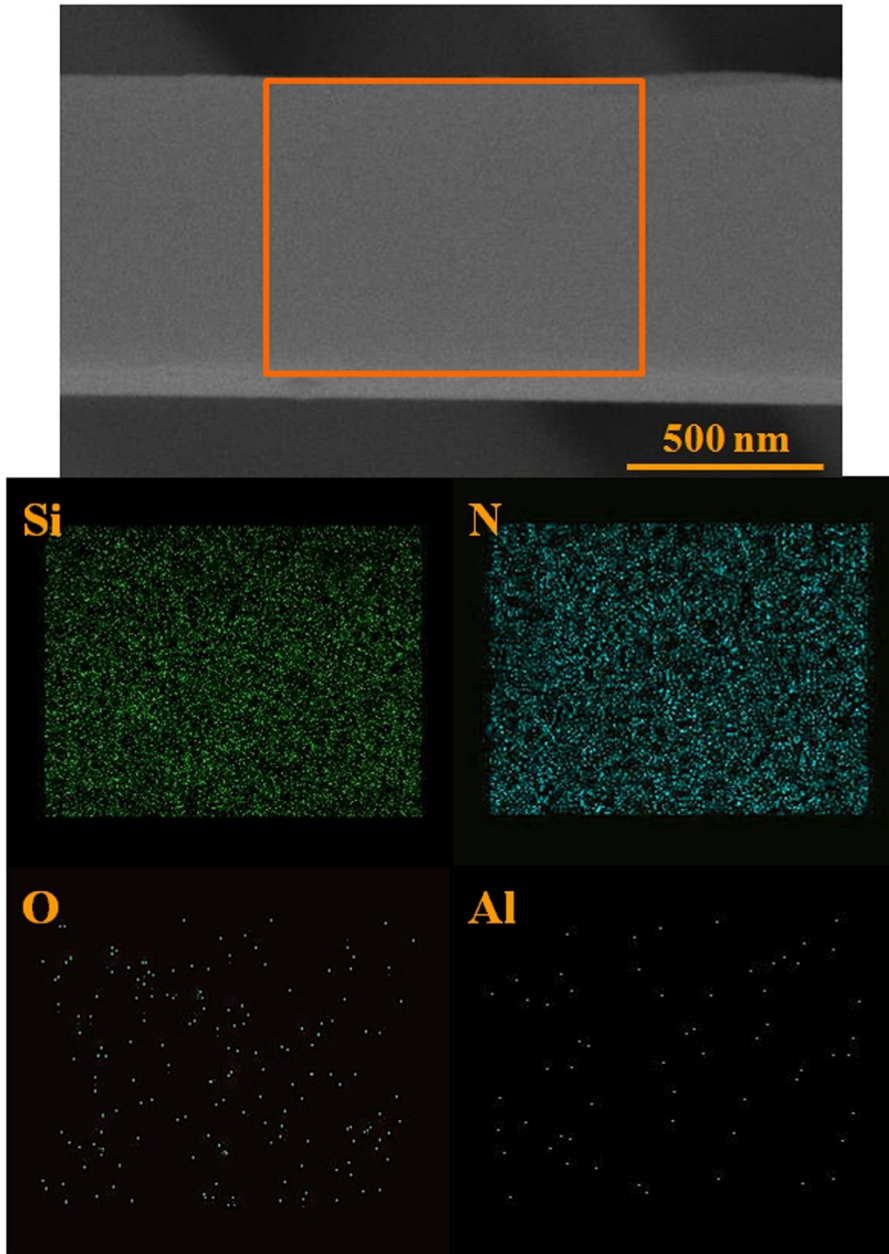

**Fig. S6** A typical elemental area scanning of Si<sub>3</sub>N<sub>4</sub> NBs.



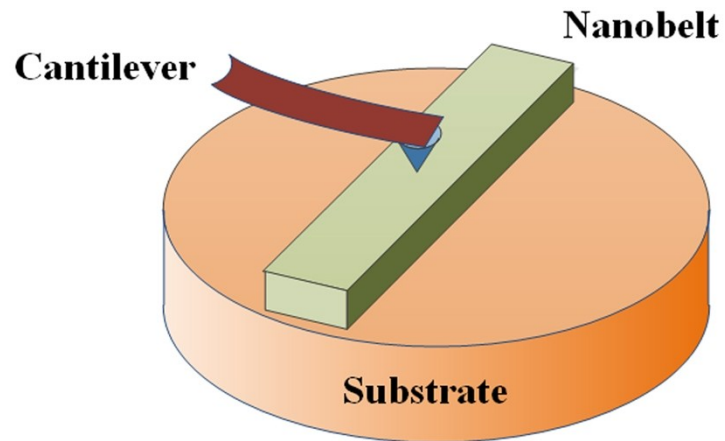

**Fig. S7** A schematic illustration for the model of nanoindentation in the system of SEM/SPM.

### References

- 1 I. Barin and G. Platzki, *Thermochemical Data of Pure Substances* 3rd edn, 1995 (Weinheim: VCH).
- 2 S. Liu, Q.J. Zhang, *Rare Met. Cem. Carbides*, 2006, **33**, 60-62.
